# Supplementary material for: Organic–inorganic one-dimensional hybrid aggregates constructed from aromatic-bisphosphonate-functionalized polyoxomolybdates
Source: Royal Society of Chemistry journal article supplement (doi:10.1039/d1dt04126f), 2022-01-01
Supplement: d1dt04126f1.pdf [file d1dt04126f1.pdf]

## <Supporting Information>

# Organic–Inorganic One-Dimensional Hybrid Aggregates Constructed from Aromatic-bisphosphonate-Functionalized Polyoxomolybdates

Hui Kong, Siyu Liu, Yanan Shi, Keli Li, Pengtao Ma, Jingping Wang\* and Jingyang Niu\*

*Henan Key Laboratory of Polyoxometalate Chemistry, Institute of Molecule and Crystal Engineering, College of Chemistry and Chemical Engineering, Henan University, Kaifeng, Henan 475004, P. R. China.*

### Contains

Section 1: Physical measurements.

Section 2: The infrared spectrum of compounds **1–5**.

Section 3: The Raman spectra of compounds **1–5**.

Section 4: The TGA curves of compounds **1–5**.

Section 5: The PXRD of compounds **1–5**.

Section 6: Additional crystal structural pictures of compound **1**.

Section 7: SEM-EDX of compounds **1–5**.

Section 8: Decay time of ligand and CIE chromaticity diagrams of compound **1**.

Section 9:  $\chi_M$  vs  $T$  curve of compounds **1–5**.

Section 10:  $\chi_M^{-1}$  vs  $T$  curve of compounds **1–5**.

Table S1: Some assigned characteristic peaks of IR spectrum of compounds **1–5**.

Table S2: Some assigned characteristic peaks of Raman spectra of compounds **1–5**.

Table S3: Decay time of compound **1** and ligand, and CIE chromaticity coordinate of compound **1**.

Table S4: Crystallographic data of five compounds.

Table S5: BVS values of Mo, P, and Tb atoms of compound **1**.

Table S6: BVS values of Ho, Er, Tm, and Yb atoms of compounds **2–5**.

Table S7: Bond length of compound **1**.

Table S8: Angel length of compound **1**.

## Physical measurements

IR spectra of all samples were recorded on a Bruker VERTEX 70 IR spectrometer using KBr pellets for solid sample palletized in the range 4000–400  $\text{cm}^{-1}$ . Raman spectra were performed on a Renishaw inVia with a red Spectra-Physics He–Ne laser (wavelength of 633 nm and 500 mW capacity). Thermogravimetric analyses (TGA) were measured by using a Mettler–Toledo TGA/SDTA 851<sup>e</sup> instrument in flowing  $\text{N}_2$  with a heating rate of 10  $^\circ\text{C min}^{-1}$ . Powder X-ray diffraction (PXRD) data were obtained on a Bruker D8 Advance instrument with Cu K $\alpha$  radiation ( $\lambda = 1.5418 \text{ \AA}$ ) in the angular range  $2\theta = 5\text{--}5^\circ$  at 293 K. C, H, and N elemental analyses were gain with an Elementar Vario EL cube CHNS analyzer. Photoluminescence properties were investigated on an EDINBURGH FLS 980 fluorescence spectrophotometer. Magnetic measurements were performed on a Quantum Design SQUID magnetometer.

## IR Spectrum

As shown in Fig. S1, the IR spectrum showed the skeletal vibrations between 500 and 4000  $\text{cm}^{-1}$  for five compounds, which is consistent with the result of single-crystal X-ray structural analysis. It also indicated that polyanions in 1–5 were isostructural. The five compounds have obvious characteristic absorption peaks at 600–1050  $\text{cm}^{-1}$ , which is the vibration of Mo–O and Mo–O–Mo in subunit  $\{\text{Mo}_5\text{O}_{15}\}$ . The absorption peaks of compounds 1–5 at 1050–1240  $\text{cm}^{-1}$  can be assigned to P–O vibrations. Strong superimposed peaks at about 1400–1600  $\text{cm}^{-1}$  are assigned to the stretching vibration of the aromatic ring and  $\text{NH}_4^+$  ions. In addition, the signal appearing at 1610–3500  $\text{cm}^{-1}$  are belonged to the flexural vibration and stretching of lattice and coordinated water molecules. Some assigned characteristic peaks of the samples are listed in Table S1.

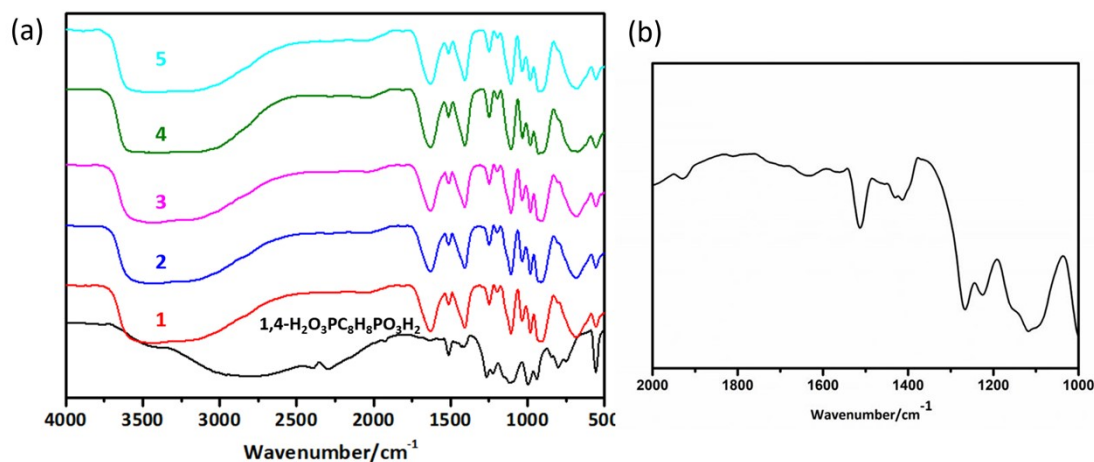

**Fig.S1.** (a) The IR of compounds 1–5 and ligand; (b) The IR of ligand between 2000–1000  $\text{cm}^{-1}$ .

**Table S1** Some assigned characteristic peaks of compounds 1–5.

| Compounds | $\nu(\text{Mo-O})$ | $\nu(\text{Mo-O-Mo})$ | $\nu(\text{P-O})$ | $\nu(\text{O-H})$ | $\delta(\text{O-H})$ |
|-----------|--------------------|-----------------------|-------------------|-------------------|----------------------|
| Ligand    | --                 | --                    | 1227(s), 1121(s)  | --                | --                   |
| 1         | 1033(s), 982(s)    | 913(s), 686(s)        | 1194(m), 1105(s)  | 3425(s)           | 1628(s)              |
| 2         | 1034(s), 983(s)    | 908(s), 685(s)        | 1200(m), 1102(s)  | 3427(s)           | 1625(s)              |
| 3         | 1033(s), 979(s)    | 910(s), 687(s)        | 1195(m), 1101(s)  | 3425(s)           | 1621(s)              |
| 4         | 1031(s), 982(s)    | 912(s), 684(s)        | 1195(m), 1101(s)  | 3420(s)           | 1624(s)              |
| 5         | 1033(s), 980(s)    | 910(s), 685(s)        | 1192(m), 1106(s)  | 3421(s)           | 1620(s)              |

## Raman spectra

The Raman spectra in the solid state were carried out as a supplement to the IR test results. As shown in Fig. S2, the obvious characteristic Raman bands at 550–1000  $\text{cm}^{-1}$  are attributable to  $\nu(\text{Mo-O})$  and  $\nu(\text{O-Mo-O})$  vibrations of the POM skeleton, respectively. The peaks from 1000–1300  $\text{cm}^{-1}$  are mainly associated with the  $\nu(\text{P-O})$  vibrations. The signals of 1400–1410  $\text{cm}^{-1}$  were assigned to the  $\nu(\text{C-H})$  vibrations of the aromatic ring. Some assigned characteristic peaks of compounds **1**–**5** are listed in Table S2. IR and Raman spectra are consistent with the results of structural analysis.

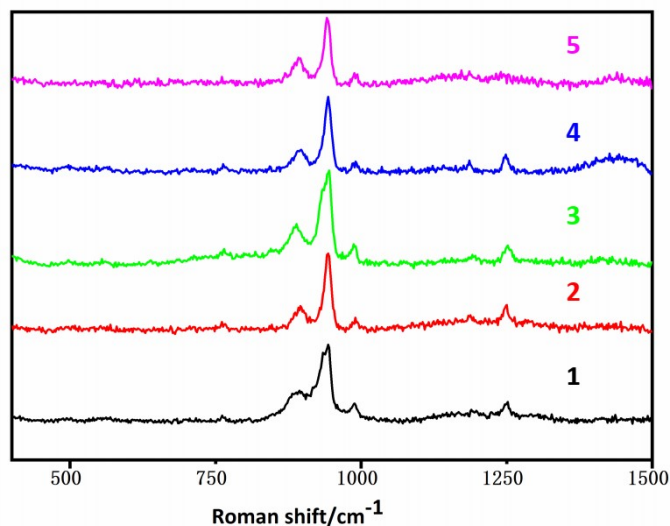

**Table S2** Some assigned characteristic Raman peaks of compounds **1**–**5**.

| compounds | $\nu(\text{Mo-O})$ | $\nu(\text{Mo-O-Mo})$ | $\nu(\text{P-O})$ |
|-----------|--------------------|-----------------------|-------------------|
| <b>1</b>  | 986, 936           | 886, 765              | 1187, 1248        |
| <b>2</b>  | 986, 940           | 880, 764              | 1187, 1245        |
| <b>3</b>  | 988, 938           | 882, 767              | 1188, 1250        |
| <b>4</b>  | 989, 936           | 884, 765              | 1185, 1245        |
| <b>5</b>  | 988, 940           | 883, 761              | 1186, 1249        |

### Thermogravimetric Analysis (TGA)

Under the protection of  $\text{N}_2$ , TGA curves of compounds **1**–**5** have been measured in the range of 25–1000  $^\circ\text{C}$ . As shown in Fig. S3, five compounds showed two consecutive weight loss changes. The first step is that the actual weight loss of **1**, is about 26.5 %, **2** is about 24.2 %, **3** is about 27.8 %, **4** is about 26.6 %, and **5** is about 28.7 % in the temperature range of 25–850  $^\circ\text{C}$ , which correspond to the loss of crystal water, coordination water, structural water, and the decomposition of the ammonium counter-cation and partial organic phosphonic acid fragments in **1**–**5**, respectively. In the second step, the mass loss is between 850–1000  $^\circ\text{C}$ , the actual weight loss of **1** is about 14.2 %, **2** is about 15.5 %, **3** is about 14.7 %, **4** is about 14.1 %, and **5** is about 13.8 %, which correspond to the loss of the remaining of organic phosphonic acid fragments, and the decomposition of the POMs skeleton.

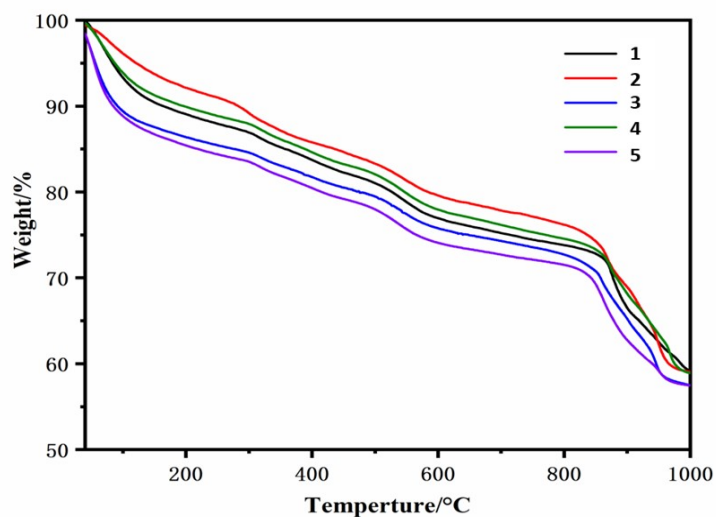

**Fig. S3.** The TGA curves of compounds 1–5.

### PXRD

As shown in Fig. S4, the experimental PXRD patterns for five POMs are consistent with the simulated patterns obtained from X-ray single-crystal diffraction, which indicate that the samples are pure. The differences of peak intensity between the experimental and simulated patterns might be due to the anisotropic effects of crystal.

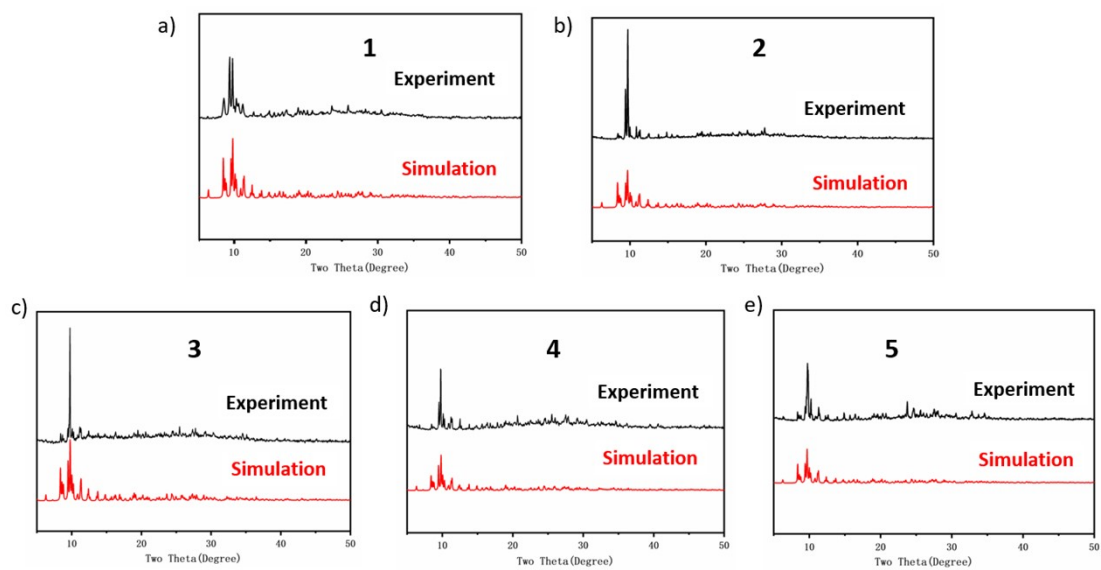

**Fig.S4.** The PXRD of compounds 1–5.

**Additional crystal structural pictures.**

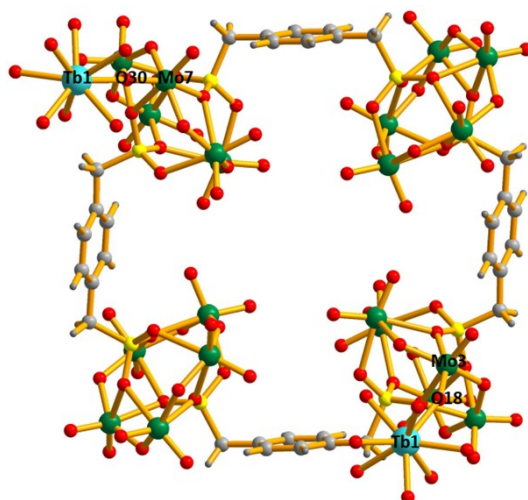

**Fig. S5.** Connection mode of between two Tb atoms in **1b** unit.

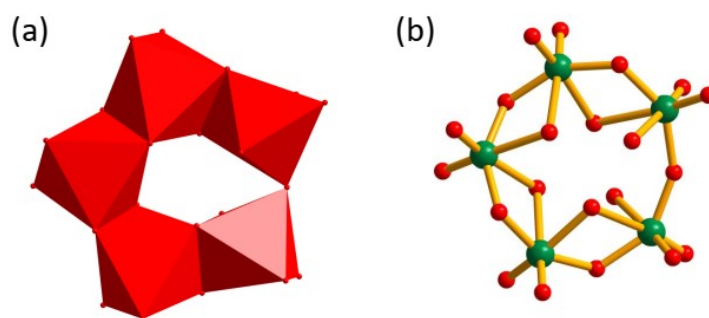

**Fig. S6.** (a) The polyhedral representation of the {Mo<sub>5</sub>O<sub>15</sub>} unit; (b) The ball-and-stick representation of the {Mo<sub>5</sub>O<sub>15</sub>} unit.

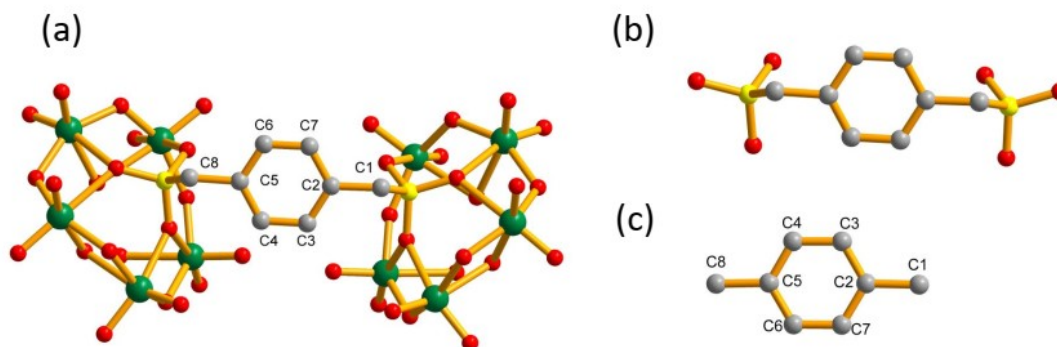

**Fig. S7.** (a) The ball-and-stick representation of {Mo<sub>10</sub>O<sub>30</sub>(1,4-O<sub>3</sub>PCH<sub>2</sub>C<sub>6</sub>H<sub>4</sub>CH<sub>2</sub>PO<sub>3</sub>)} fragment; (a) The ball-and-stick representation of {1,4-O<sub>3</sub>PCH<sub>2</sub>C<sub>6</sub>H<sub>4</sub>CH<sub>2</sub>PO<sub>3</sub>} fragment; (c) The ball-and-stick representation of {CH<sub>2</sub>C<sub>6</sub>H<sub>4</sub>CH<sub>2</sub>} fragment.

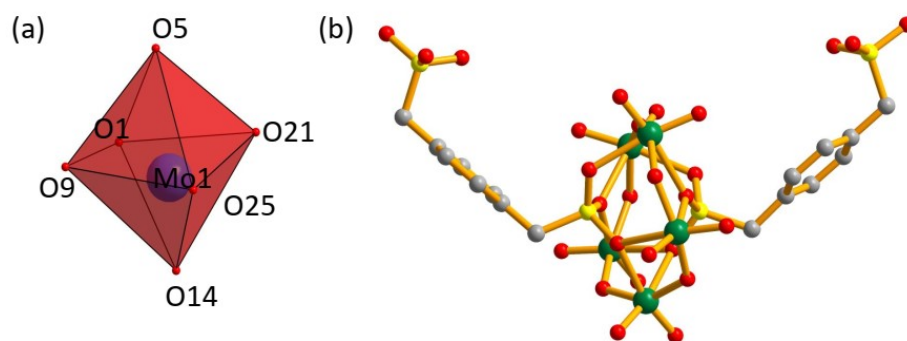

**Fig. S8.** (a) The coordination mode of  $\text{Mo}^{16+}$ ; (b) Connection mode of between two  $\text{H}_2\text{O}_3\text{PCH}_2\text{C}_6\text{H}_4\text{CH}_2\text{PO}_3\text{H}_2$  ligands and  $\{\text{Mo}_5\text{O}_{15}\}$  unit.

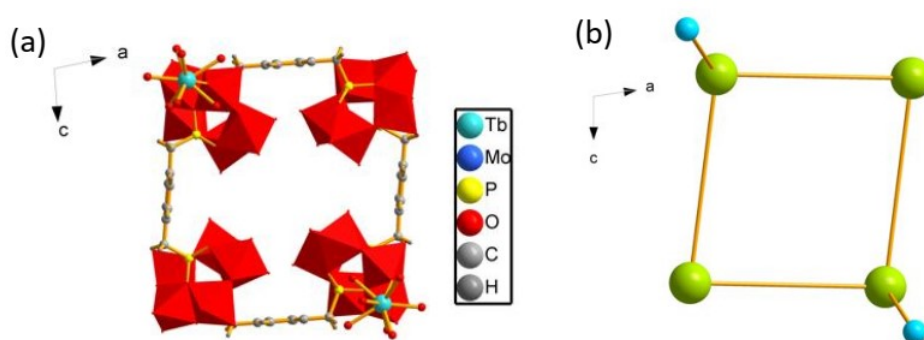

**Fig. S9.** (a) A view along the  $b$  axis of **1**; (b) A simplified view along the  $b$  axis of the **1**.

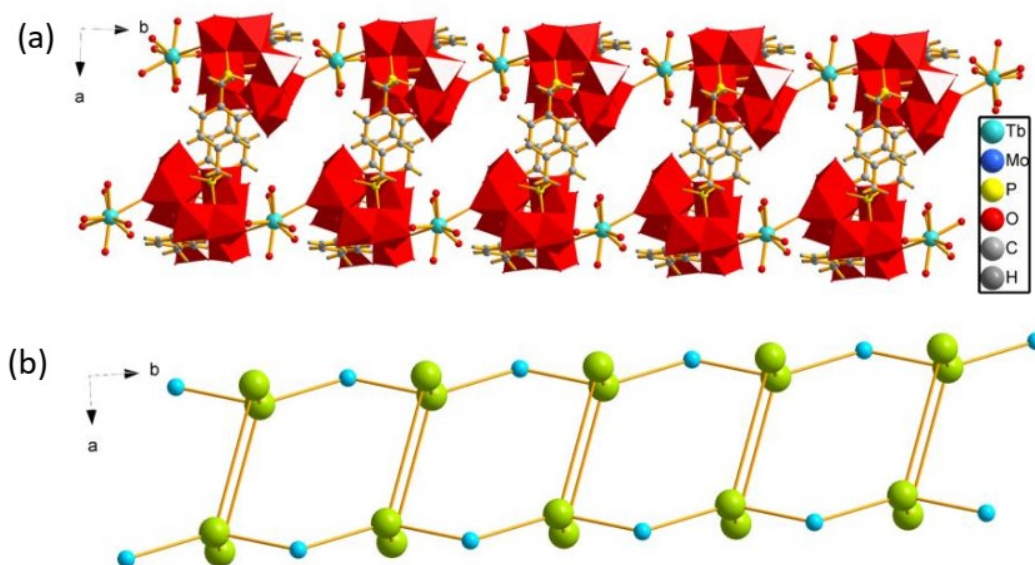

**Fig. S10.** (a) 1-D chain along the  $c$  axis of **1**; (b) A simplified view along the  $c$  axis of the 1-D chain of **1**.



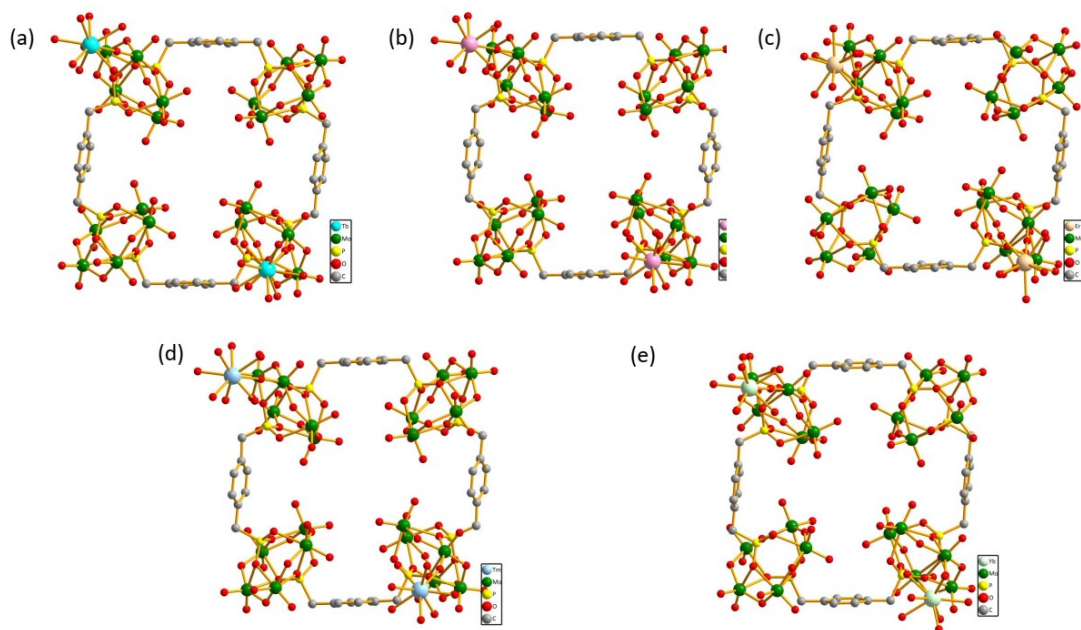

**Fig. S11** (a-e) The thermal ellipsoidal diagram of the asymmetric unit in the crystal structure of compounds 1-5.

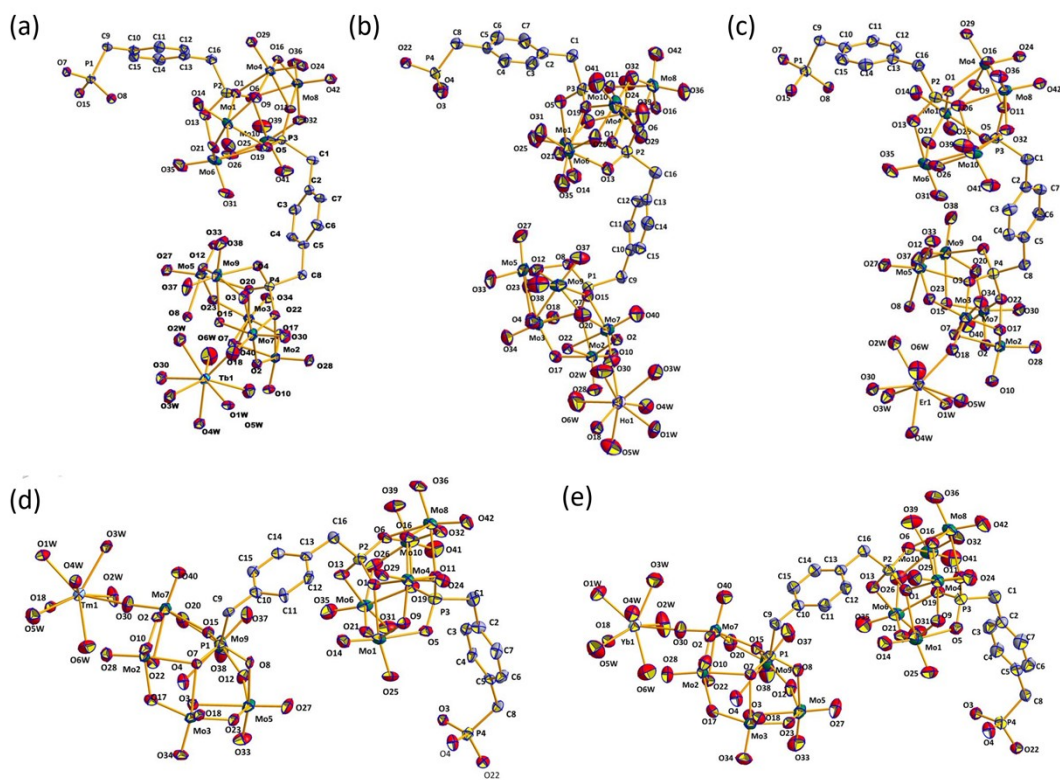

**Fig. S12** (a-e) Representative orped diagram of the asymmetric unit in the crystal structure of compounds 1-5. All the hydrogen atoms are omitted for clarity.

## SEM-EDX study

Scanning electron microscope (SEM) and energy dispersive spectroscopy (EDS) are presented for compounds **1–5**. The results show that the morphologies of **1–5** are shaped block, and these elements (O, P, Na, Mo, Ln) are present and distributed in the compounds **1–5** (Fig. S13-S17). The EDX elemental spectra for **1–5**, shown in Fig. S18, suggest the number ratio of Na, Mo, P, and Ln is about 1.05 : 7.28 : 3.02 : 0.66. Combined with the ratio of Mo, P, and Ln atoms determined in the anionic structural formula is 10 : 4 : 1, and the number is 20, 8, and 2, respectively, the number of Na is 2.88, which is about 3.

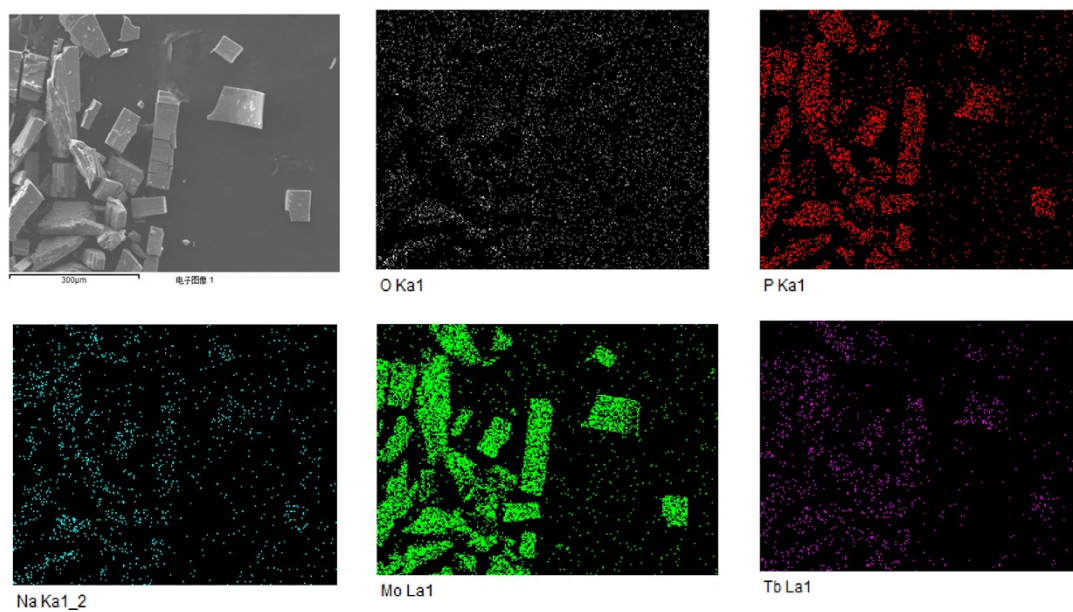

**Fig. S13** SEM-EDX element maps of **1**.

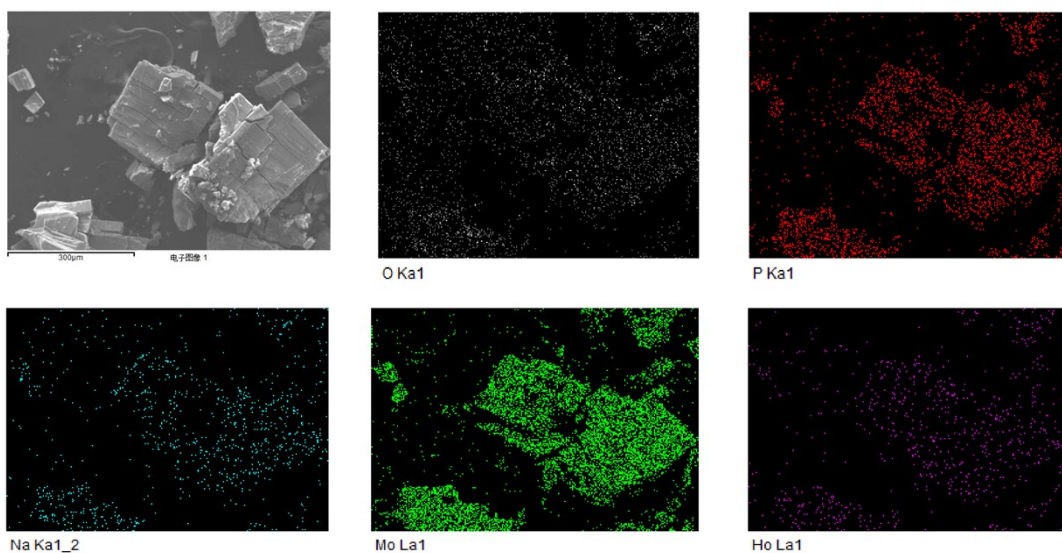

**Fig. S14** SEM-EDX element maps of **2**.



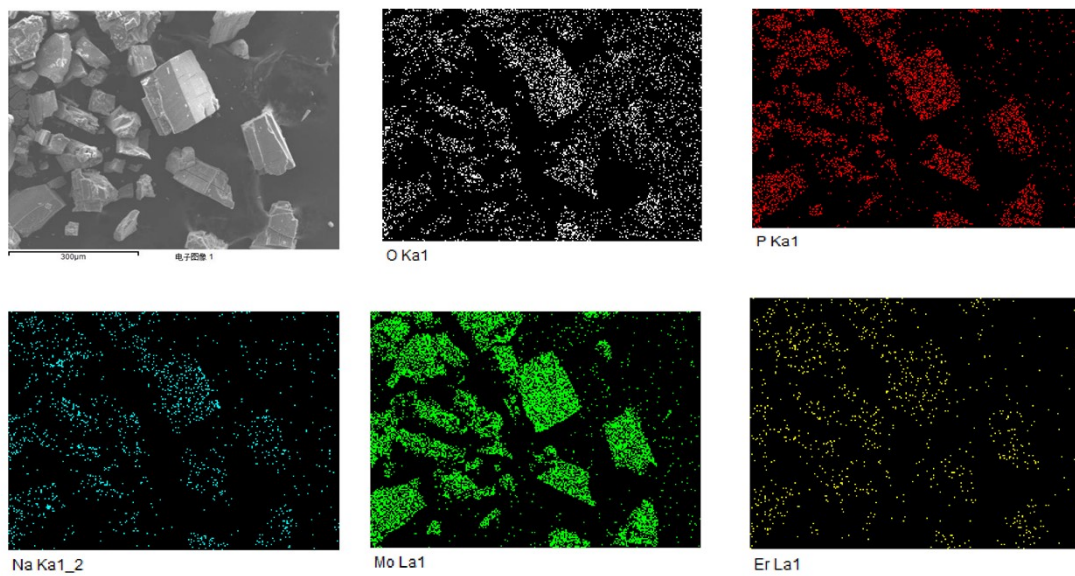

**Fig. S15** SEM-EDX element maps of 3.

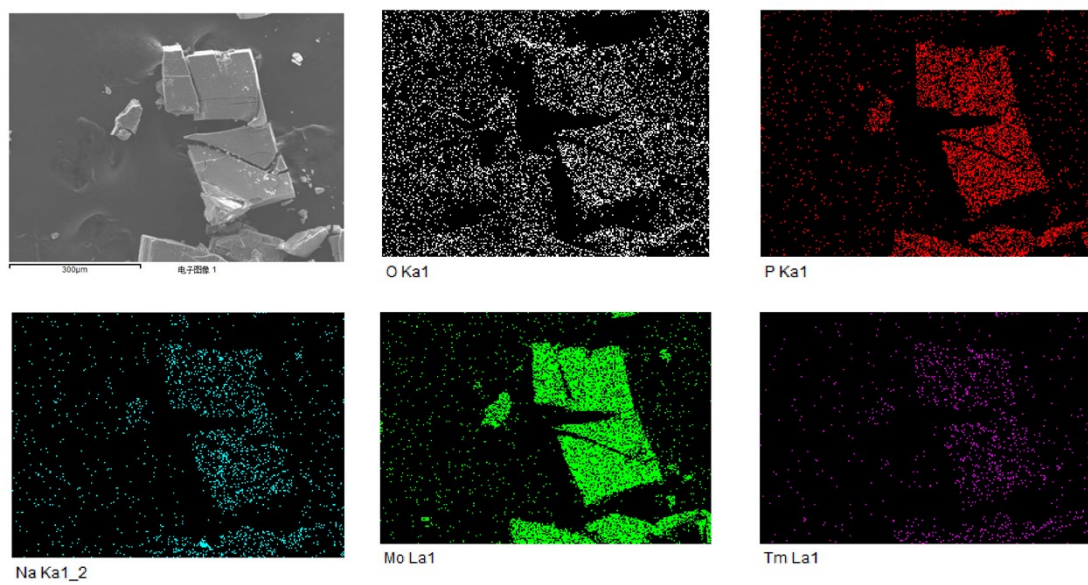

**Fig. S16** SEM-EDX element maps of 4.

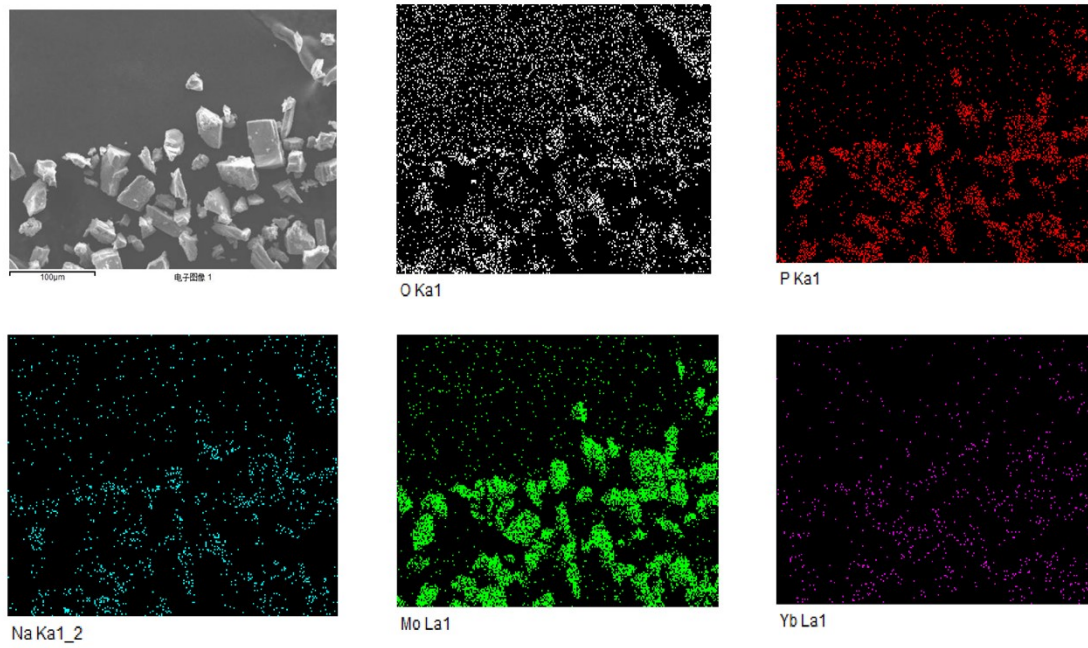

**Fig. S17** SEM-EDX element maps of 5.

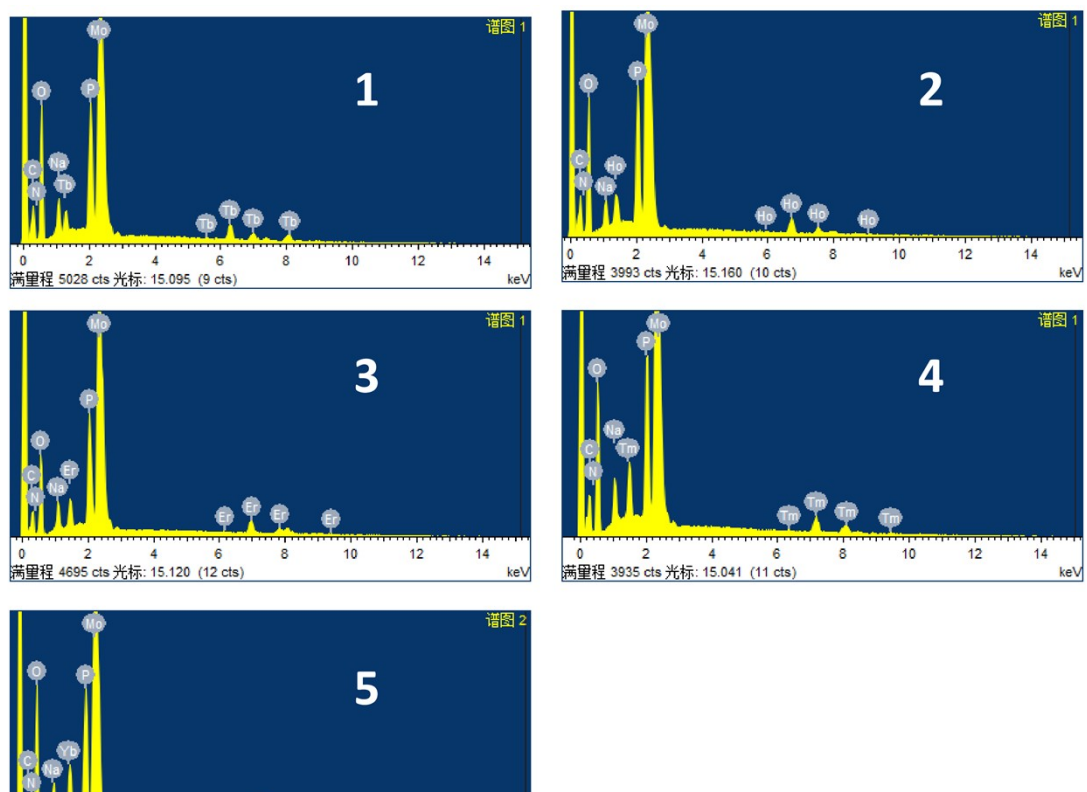

**Fig. S18.** EDX elemental spectra of 1–5 showing the presence of Na, C, N, O, P, Mo, and Ln element in the lattice.

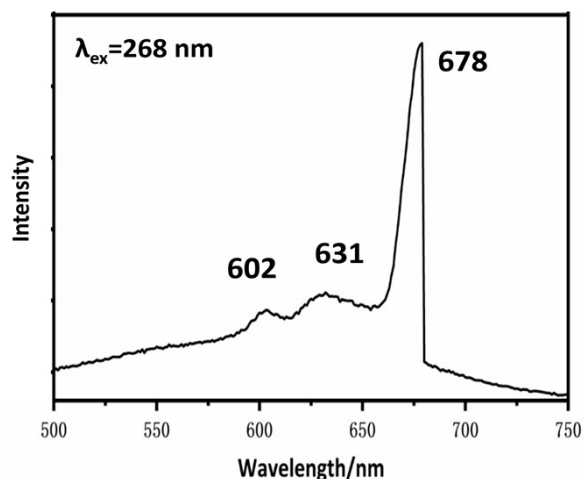

**Fig. S19** the emission spectrum of free ligand under excitation at 268 nm.

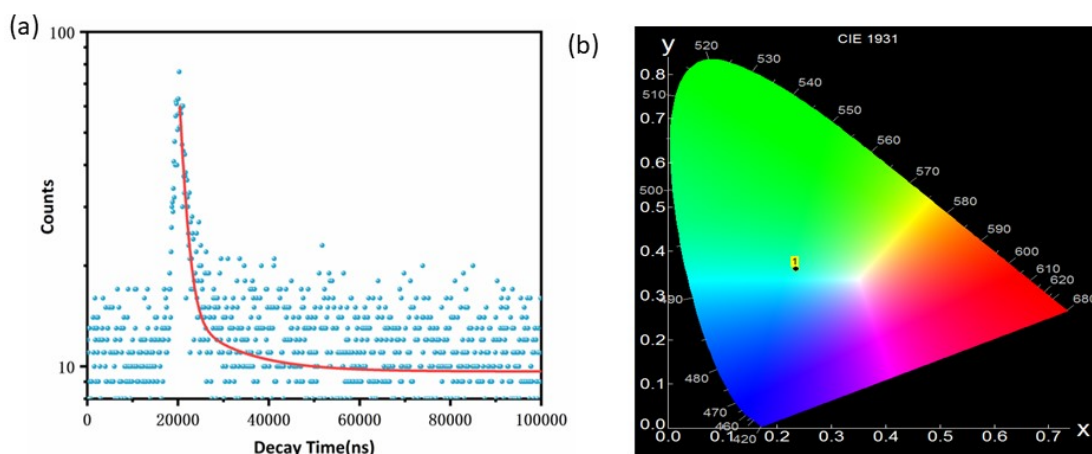

**Fig. S20.** (a) Decay time of ligand; (b) CIE chromaticity diagrams of compound **1**.

**Table S3.** Decay time of and compound **1** and ligand, and CIE chromaticity coordinate of compound **1**.

| Compound | Decay time ( $\mu\text{s}$ ) |                | (x, y) |      |
|----------|------------------------------|----------------|--------|------|
|          | $\tau_1$                     | $\tau_2$       |        |      |
| <b>1</b> | 588.69 (100%)                | -              | 0.23   | 0.36 |
| Ligand   | 1.36 (54.06%)                | 11.35 (43.94%) | -      | -    |

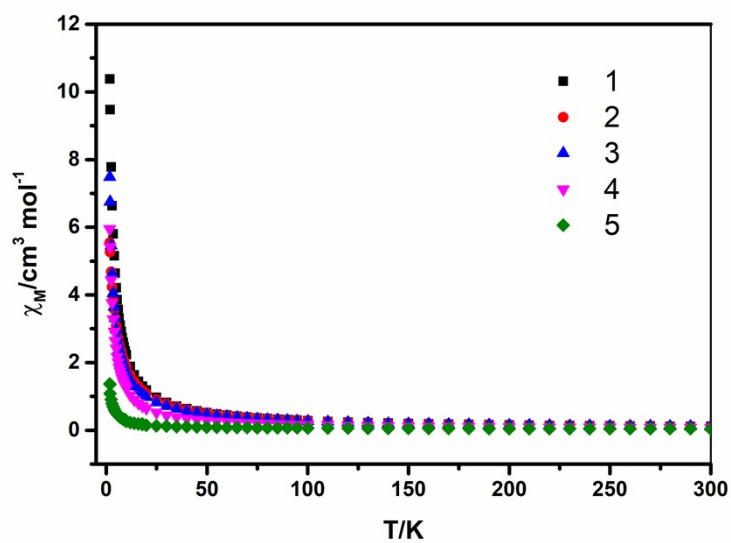

Fig. S21.  $\chi_M$  vs  $T$  curve of compounds 1–5.

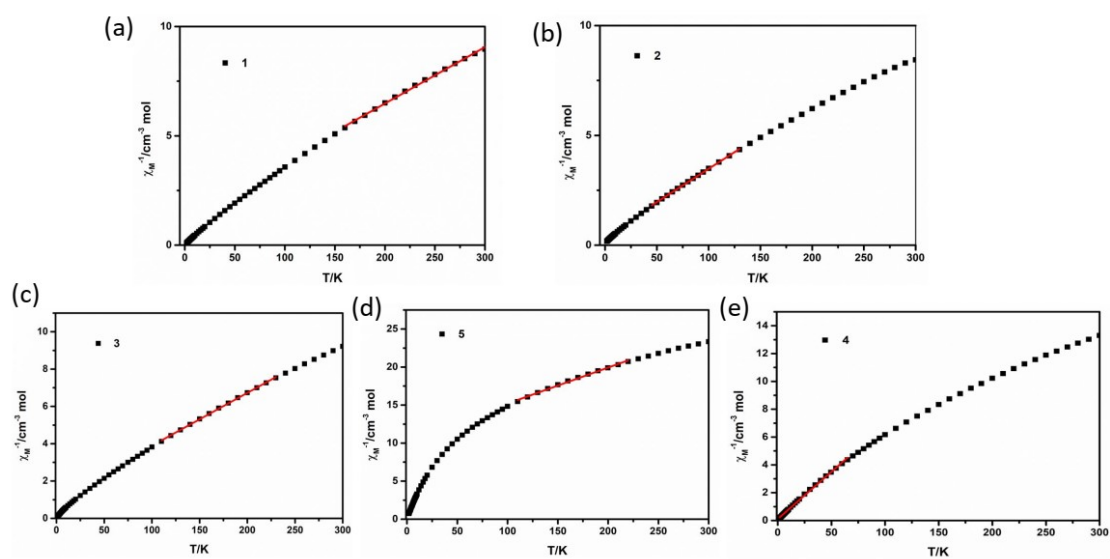

Fig. 22.  $\chi_M^{-1}$  vs  $T$  curve of compounds 1–5.

**Table S4. Crystallographic data of five compounds.**

| Compound                                         | 1                                                 | 2                                                 | 3                                                 | 4                                                 | 5                                                 |
|--------------------------------------------------|---------------------------------------------------|---------------------------------------------------|---------------------------------------------------|---------------------------------------------------|---------------------------------------------------|
| Empirical formula                                | $N_5C_{32}H_{148}Mo_{20}Na_3O_{15}$<br>$2P_8Tb_2$ | $N_5C_{32}H_{126}Ho_2Mo_{20}Na_3$<br>$O_{141}P_8$ | $N_5C_{32}H_{164}Er_2Mo_{20}Na_3$<br>$O_{160}P_8$ | $N_5C_{32}H_{142}Mo_{20}Na_3O_{149}$<br>$P_8Tm_2$ | $N_5C_{32}H_{176}Mo_{20}Na_3O_{16}$<br>$6P_8Yb_2$ |
| Formula weight                                   | 5588.87                                           | 5402.71                                           | 5749.65                                           | 5554.84                                           | 5869.31                                           |
| Temperature/K                                    | 150                                               | 150                                               | 150                                               | 150                                               | 296                                               |
| Crystal system                                   | monoclinic                                        | monoclinic                                        | monoclinic                                        | monoclinic                                        | monoclinic                                        |
| Space group                                      | $C2/c$                                            | $C2/c$                                            | $C2/c$                                            | $C2/c$                                            | $C2/c$                                            |
| $a/\text{\AA}$                                   | 36.2646(11)                                       | 36.542(3)                                         | 36.542(3)                                         | 36.3225(11)                                       | 36.803(6)                                         |
| $b/\text{\AA}$                                   | 11.0382(3)                                        | 11.0120(7)                                        | 11.0085(3)                                        | 10.9837(3)                                        | 11.0192(14)                                       |
| $c/\text{\AA}$                                   | 37.7938(10)                                       | 37.666(3)                                         | 36.3183(10)                                       | 37.6737(11)                                       | 37.831(5)                                         |
| $\beta/^\circ$                                   | 97.7710(10)                                       | 97.630(3)                                         | 98.0830(10)                                       | 97.8310(10)                                       | 97.728(5)                                         |
| Volume/ $\text{\AA}^3$                           | 14989.8(7)                                        | 15247(3)                                          | 14939.4(8)                                        | 14890.0(7)                                        | 15203(4)                                          |
| Z                                                | 4                                                 | 4                                                 | 4                                                 | 4                                                 | 4                                                 |
| $\rho_{\text{calc}}/\text{cm}^3$                 | 2.197                                             | 2.057                                             | 2.134                                             | 2.142                                             | 2.086                                             |
| $\mu/\text{mm}^{-1}$                             | 2.742                                             | 2.794                                             | 2.919                                             | 2.993                                             | 2.993                                             |
| $2\theta$ range/ $^\circ$                        | 4.506-50.2                                        | 4.498-50.198                                      | 4.36-50.2                                         | 4.366-50.198                                      | 4.356-50.2                                        |
|                                                  | $-43 \leq h \leq 43$                              | $-44 \leq h \leq 41$                              | $-43 \leq h \leq 41$                              | $-43 \leq h \leq 43$                              | $-43 \leq h \leq 43$                              |
| Index ranges                                     | $-13 \leq k \leq 12$                              | $-11 \leq k \leq 13$                              | $-11 \leq k \leq 13$                              | $-13 \leq k \leq 13$                              | $-13 \leq k \leq 12$                              |
|                                                  | $-42 \leq l \leq 45$                              | $-45 \leq l \leq 44$                              | $-24 \leq l \leq 45$                              | $-44 \leq l \leq 44$                              | $-45 \leq l \leq 45$                              |
| $F(000)$                                         | 9500.0                                            | 8972.0                                            | 9140.0                                            | 9148.0                                            | 9076.0                                            |
| Reflections collected                            | 53945                                             | 41348                                             | 37439                                             | 70129                                             | 62863                                             |
| GoF( $F^2$ )                                     | 1.009                                             | 1.020                                             | 1.010                                             | 1.015                                             | 1.038                                             |
| $R_1, wR_2 [I \geq 2\sigma(I)]$                  | 0.0430, 0.0931                                    | 0.0441, 0.1125                                    | 0.0436, 0.1004                                    | 0.0536, 0.1031                                    | 0.0314, 0.0863                                    |
| $R_1, wR_2$ [all data]                           | 0.0593, 0.1023                                    | 0.0538, 0.1183                                    | 0.0548, 0.1069                                    | 0.0948, 0.1222                                    | 0.0364, 0.0898                                    |
| Largest diff. peak/hole<br>/ $e \text{\AA}^{-3}$ | 2.17/-1.75                                        | 1.60/-1.70                                        | 1.88/-1.43                                        | 1.61/-1.40                                        | 1.75/-1.07                                        |

**Table S5. BVS values of Mo, P and Tb atoms of compound 1.**

| Atom | BVS  | Atom | BVS  | Atom | BVS  |
|------|------|------|------|------|------|
| Mo1  | 6.13 | Mo6  | 6.09 | P1   | 5.01 |
| Mo2  | 6.14 | Mo7  | 6.15 | P2   | 4.94 |
| Mo3  | 6.12 | Mo8  | 6.18 | P3   | 5.08 |
| Mo4  | 6.04 | Mo9  | 6.07 | P4   | 5.01 |
| Mo5  | 6.14 | Mo10 | 6.06 | Tb1  | 3.31 |

**Table S6. Bond length and BVS values of Ho, Er, Tm and Yb atoms in compounds 2-5.**

| Bond                 | Bond length |
|----------------------|-------------|----------------------|-------------|----------------------|-------------|----------------------|-------------|
| Ho1-O18 <sup>1</sup> | 2.343(6)    | Er1-O18 <sup>1</sup> | 2.375(15)   | Tm1-O18 <sup>1</sup> | 2.334(8)    | Yb1-O18 <sup>1</sup> | 2.303(4)    |
| Ho1-O30              | 2.337(6)    | Er1-O30              | 2.302(16)   | Tm1-O30              | 2.321(9)    | Yb1-O30              | 2.311(5)    |
| Ho1-O1W              | 2.353(6)    | Er1-O1W              | 2.341(14)   | Tm1-O1W              | 2.330(9)    | Yb1-O1W              | 2.328(5)    |
| Ho1-O4W              | 2.327(6)    | Er1-O4W              | 2.316(14)   | Tm1-O4W              | 2.295(9)    | Yb1-O4W              | 2.292(5)    |



|         |          |         |           |         |           |         |          |
|---------|----------|---------|-----------|---------|-----------|---------|----------|
| Ho1-O2W | 2.361(7) | Er1-O2W | 2.349(17) | Tm1-O2W | 2.355(10) | Yb1-O2W | 2.308(6) |
| Ho1-O3W | 2.401(7) | Er1-O3W | 2.381(17) | Tm1-O3W | 2.407(9)  | Yb1-O3W | 2.372(6) |
| Ho1-O5W | 2.387(8) | Er1-O5W | 2.391(19) | Tm1-O5W | 2.363(10) | Yb1-O5W | 2.346(6) |
| Ho1-O6W | 2.323(9) | Er1-O6W | 2.320(18) | Tm1-O6W | 2.322(11) | Yb1-O6W | 2.300(7) |

BVS(Ho1) = 3.31

BVS(Er1) = 3.26

BVS(Tm1) = 3.22

BVS(Yb1) = 3.29

**Table S7. Bond length of compound Co1.**

| Bond                  | Bond length | Bond                 | Bond length | Bond                 | Bond length |
|-----------------------|-------------|----------------------|-------------|----------------------|-------------|
| Mo1-O1                | 2.379(6)    | Mo2-O2               | 1.911(6)    | Mo3-O3               | 2.173(6)    |
| Mo1-O52               | 2.314(6)    | Mo2-O7               | 2.272(6)    | Mo3-O7               | 2.349(6)    |
| Mo1-O9                | 1.907(6)    | Mo2-O10              | 1.715(6)    | Mo3-O17              | 1.902(6)    |
| Mo1-O14               | 1.710(7)    | Mo2-O17              | 1.919(6)    | Mo3-O18              | 1.737(6)    |
| Mo1-O21               | 1.918(6)    | Mo2-O22              | 2.320(6)    | Mo3-O23              | 1.934(6)    |
| Mo1-O25               | 1.692(7)    | Mo2-O28              | 1.703(6)    | Mo3-O34              | 1.709(6)    |
| Mo4-O1                | 2.222(6)    | Mo5-O3               | 2.416(6)    | Mo6-O13              | 2.243(6)    |
| Mo4-O9                | 1.920(6)    | Mo5-O8               | 2.258(6)    | Mo6-O19 <sup>2</sup> | 2.359(6)    |
| Mo4-O11 <sup>2</sup>  | 2.358(6)    | Mo5-O12              | 1.886(7)    | Mo6-O21              | 1.905(7)    |
| Mo4-O16               | 1.955(6)    | Mo5-O23              | 1.946(6)    | Mo6-O26              | 1.942(7)    |
| Mo4-O24               | 1.715(7)    | Mo5-O27              | 1.710(7)    | Mo6-O31              | 1.704(7)    |
| Mo4-O29               | 1.709(6)    | Mo5-O33              | 1.697(7)    | Mo6-O35              | 1.711(7)    |
| Mo7-O2                | 1.944(6)    | Mo8-O6               | 2.312(7)    | Mo9-O4               | 2.309(7)    |
| Mo7-O15               | 2.170(6)    | Mo8-O11 <sup>2</sup> | 2.309(6)    | Mo9-O12              | 1.907(7)    |
| Mo7-O20               | 1.909(7)    | Mo8-O16              | 1.921(6)    | Mo9-O15              | 2.418(6)    |
| Mo7-O22               | 2.392(6)    | Mo8-O32              | 1.911(6)    | Mo9-O20              | 1.919(6)    |
| Mo7-O30               | 1.728(7)    | Mo8-O36              | 1.697(7)    | Mo9-O37              | 1.719(7)    |
| Mo7-O40               | 1.695(7)    | Mo8-O42              | 1.708(7)    | Mo9-O38              | 1.701(7)    |
| Mo10-O6               | 2.418(6)    | P1-O7                | 1.539(6)    | P2-O1                | 1.540(7)    |
| Mo10-O19 <sup>2</sup> | 2.190(6)    | P1-O8                | 1.512(6)    | P2-O6                | 1.544(6)    |
| Mo10-O26              | 1.962(7)    | P1-O15               | 1.552(7)    | P2-O13               | 1.513(7)    |
| Mo10-O32              | 1.903(8)    | P1-C9                | 1.787(9)    | P2-C16               | 1.801(9)    |
| Mo10-O39              | 1.720(8)    | P3-O5                | 1.507(7)    | P3-O19               | 1.548(7)    |
| Mo10-O41              | 1.696(7)    | P3-O11               | 1.535(6)    | P3-C1                | 1.781(10)   |
| P4-O3                 | 1.556(7)    | Tb1-O18 <sup>1</sup> | 2.371(6)    | Tb1-O2W              | 2.385(7)    |
| P4-O4                 | 1.512(6)    | Tb1-O30              | 2.360(7)    | Tb1-O3W              | 2.446(7)    |
| P4-O22                | 1.546(6)    | Tb1-O1W              | 2.376(6)    | Tb1-O5W              | 2.400(7)    |
| P4-C8                 | 1.773(9)    | Tb1-O4W              | 2.336(7)    | Tb1-O6W              | 2.368(9)    |

**Table S8. Angel length of compound 1.**

| Bond       | Angel   | Bond       | Angel    | Bond       | Angel   |
|------------|---------|------------|----------|------------|---------|
| O52-Mo1-O1 | 87.5(2) | O2-Mo2-O7  | 80.8(2)  | O3-Mo3-O7  | 73.7(2) |
| O9-Mo1-O1  | 69.8(2) | O2-Mo2-O17 | 146.6(2) | O17-Mo3-O3 | 83.6(2) |
| O9-Mo1-O52 | 77.4(2) | O2-Mo2-O22 | 73.9(2)  | O17-Mo3-O7 | 71.7(2) |

|                          |          |                          |          |                          |          |
|--------------------------|----------|--------------------------|----------|--------------------------|----------|
| O9-Mo1-O21               | 143.6(3) | O7-Mo2-O22               | 80.7(2)  | O17-Mo3-O23              | 152.4(3) |
| O14-Mo1-O1               | 86.6(3)  | O10-Mo2-O2               | 99.0(3)  | O18-Mo3-O3               | 156.5(3) |
| O14-Mo1-O52              | 174.1(3) | O10-Mo2-O7               | 89.3(3)  | O18-Mo3-O7               | 86.2(3)  |
| O14-Mo1-O9               | 100.8(3) | O10-Mo2-O17              | 101.2(3) | O18-Mo3-O17              | 101.8(3) |
| O14-Mo1-O21              | 99.8(3)  | O10-Mo2-O22              | 168.5(3) | O18-Mo3-O23              | 93.8(3)  |
| O21-Mo1-O1               | 81.9(2)  | O17-Mo2-O7               | 73.2(2)  | O23-Mo3-O3               | 73.5(2)  |
| O21-Mo1-O52              | 79.0(3)  | O17-Mo2-O22              | 81.4(2)  | O23-Mo3-O7               | 86.9(2)  |
| O25-Mo1-O1               | 168.5(3) | O28-Mo2-O2               | 100.3(3) | O34-Mo3-O3               | 96.8(3)  |
| O25-Mo1-O52              | 83.3(3)  | O28-Mo2-O7               | 166.4(3) | O34-Mo3-O7               | 166.2(3) |
| O25-Mo1-O9               | 101.4(3) | O28-Mo2-O10              | 103.9(3) | O34-Mo3-O17              | 97.8(3)  |
| O25-Mo1-O14              | 102.6(3) | O28-Mo2-O17              | 100.3(3) | O34-Mo3-O18              | 105.0(3) |
| O25-Mo1-O21              | 102.9(3) | O28-Mo2-O22              | 86.5(3)  | O34-Mo3-O23              | 100.1(3) |
| O1-Mo4-O11 <sup>2</sup>  | 73.1(2)  | O8-Mo5-O3                | 88.6(2)  | O13-Mo6-O19 <sup>2</sup> | 87.3(2)  |
| O9-Mo4-O1                | 73.3(2)  | O12-Mo5-O3               | 84.3(2)  | O21-Mo6-O13              | 80.2(3)  |
| O9-Mo4-O11 <sup>2</sup>  | 87.0(2)  | O12-Mo5-O8               | 80.6(3)  | O21-Mo6-O19 <sup>2</sup> | 83.9(2)  |
| O9-Mo4-O16               | 151.2(3) | O12-Mo5-O23              | 144.7(3) | O21-Mo6-O26              | 145.8(3) |
| O16-Mo4-O1               | 81.4(2)  | O23-Mo5-O3               | 67.8(2)  | O26-Mo6-O13              | 78.0(3)  |
| O16-Mo4-O11 <sup>2</sup> | 72.4(2)  | O23-Mo5-O8               | 77.5(2)  | O26-Mo6-O19 <sup>2</sup> | 69.0(3)  |
| O24-Mo4-O1               | 158.5(3) | O27-Mo5-O3               | 168.7(3) | O31-Mo6-O13              | 172.7(3) |
| O24-Mo4-O9               | 98.8(3)  | O27-Mo5-O8               | 84.7(3)  | O31-Mo6-O19 <sup>2</sup> | 85.5(3)  |
| O24-Mo4-O11 <sup>2</sup> | 86.7(3)  | O27-Mo5-O12              | 103.5(3) | O31-Mo6-O21              | 99.9(3)  |
| O24-Mo4-O16              | 99.9(3)  | O27-Mo5-O23              | 101.8(3) | O31-Mo6-O26              | 98.5(3)  |
| O29-Mo4-O1               | 96.1(3)  | O33-Mo5-O3               | 84.0(3)  | O31-Mo6-O35              | 102.4(4) |
| O29-Mo4-O9               | 101.3(3) | O33-Mo5-O8               | 172.4(3) | O35-Mo6-O13              | 84.6(3)  |
| O29-Mo4-O11 <sup>2</sup> | 164.2(3) | O33-Mo5-O12              | 100.0(3) | O35-Mo6-O19 <sup>2</sup> | 168.3(3) |
| O29-Mo4-O16              | 94.8(3)  | O33-Mo5-O23              | 98.3(3)  | O35-Mo6-O21              | 102.9(3) |
| O29-Mo4-O24              | 105.1(3) | O33-Mo5-O27              | 102.4(4) | O35-Mo6-O26              | 101.0(4) |
| O2-Mo7-O15               | 81.5(2)  | O112-Mo8-O6              | 80.9(2)  | O4-Mo9-O15               | 88.1(2)  |
| O2-Mo7-O22               | 71.7(2)  | O16-Mo8-O6               | 79.3(2)  | O12-Mo9-O4               | 79.4(3)  |
| O15-Mo7-O22              | 74.3(2)  | O16-Mo8-O11 <sup>2</sup> | 74.2(2)  | O12-Mo9-O15              | 82.3(2)  |
| O20-Mo7-O2               | 151.4(3) | O32-Mo8-O6               | 73.8(3)  | O12-Mo9-O20              | 143.4(3) |
| O20-Mo7-O15              | 74.7(3)  | O32-Mo8-O11 <sup>2</sup> | 81.0(3)  | O20-Mo9-O4               | 77.8(3)  |
| O20-Mo7-O22              | 86.6(3)  | O32-Mo8-O16              | 145.8(3) | O20-Mo9-O15              | 68.8(2)  |
| O30-Mo7-O2               | 98.4(3)  | O36-Mo8-O6               | 87.9(3)  | O37-Mo9-O4               | 172.1(3) |
| O30-Mo7-O15              | 160.0(3) | O36-Mo8-O11 <sup>2</sup> | 167.3(3) | O37-Mo9-O12              | 98.9(3)  |
| O30-Mo7-O20              | 98.6(3)  | O36-Mo8-O16              | 98.0(3)  | O37-Mo9-O15              | 84.0(3)  |
| O30-Mo7-O22              | 86.6(3)  | O36-Mo8-O32              | 101.7(3) | O37-Mo9-O20              | 99.8(3)  |
| O40-Mo7-O2               | 96.8(3)  | O36-Mo8-O42              | 105.0(4) | O38-Mo9-O4               | 85.3(3)  |
| O40-Mo7-O15              | 97.2(3)  | O42-Mo8-O6               | 167.0(3) | O38-Mo9-O12              | 103.8(3) |
| O40-Mo7-O20              | 101.7(3) | O42-Mo8-O11 <sup>2</sup> | 86.5(3)  | O38-Mo9-O15              | 170.0(3) |
| O40-Mo7-O22              | 166.3(3) | O42-Mo8-O16              | 100.1(3) | O38-Mo9-O20              | 102.4(3) |

|                           |          |                          |          |                          |          |
|---------------------------|----------|--------------------------|----------|--------------------------|----------|
| O40-Mo7-O30               | 102.6(3) | O42-Mo8-O32              | 101.4(3) | O38-Mo9-O37              | 102.6(4) |
| O192-Mo10-O6              | 72.6(2)  | P1-O15-Mo7               | 130.4(4) | P4-O3-Mo3                | 130.2(3) |
| O26-Mo10-O6               | 86.7(2)  | P1-O15-Mo9               | 133.6(3) | P4-O3-Mo5                | 132.0(3) |
| O26-Mo10-O19 <sup>2</sup> | 72.4(3)  | P1-O7-Mo2                | 126.6(3) | P4-O4-Mo9                | 120.7(4) |
| O32-Mo10-O6               | 71.4(2)  | P1-O7-Mo3                | 129.3(3) | P4-O22-Mo2               | 126.0(3) |
| O32-Mo10-O19 <sup>2</sup> | 83.4(3)  | P1-O8-Mo5                | 120.6(3) | P4-O22-Mo7               | 128.1(3) |
| O32-Mo10-O26              | 151.5(3) | P2-O13-Mo6               | 121.1(4) | O181-Tb1-O1W             | 77.8(2)  |
| O39-Mo10-O6               | 86.9(3)  | P2-O6-Mo8                | 126.6(4) | O181-Tb1-O2W             | 71.7(2)  |
| O39-Mo10-O19 <sup>2</sup> | 156.4(3) | P2-O6-Mo10               | 127.1(4) | O181-Tb1-O3W             | 116.9(2) |
| O39-Mo10-O26              | 95.4(4)  | P2-O1-Mo1                | 135.2(3) | O181-Tb1-O5W             | 73.3(2)  |
| O39-Mo10-O32              | 101.3(4) | P2-O1-Mo4                | 129.3(3) | O181-Tb1-O1W             | 77.8(2)  |
| O41-Mo10-O6               | 166.1(3) | P3-O5-Mo12               | 119.7(3) | O30-Tb1-O18 <sup>1</sup> | 138.0(2) |
| O41-Mo10-O19 <sup>2</sup> | 97.6(3)  | P3-O11-Mo42              | 128.6(3) | O30-Tb1-O1W              | 138.9(2) |
| O41-Mo10-O26              | 99.8(4)  | P3-O11-Mo82              | 126.3(4) | O30-Tb1-O2W              | 73.0(2)  |
| O41-Mo10-O32              | 98.2(4)  | P3-O19-Mo62              | 133.7(4) | O30-Tb1-O3W              | 72.4(3)  |
| O41-Mo10-O39              | 104.5(4) | P3-O19-Mo10 <sup>2</sup> | 128.5(4) | O30-Tb1-O5W              | 127.0(2) |
| O1W-Tb1-O2W               | 114.8(3) | O4W-Tb1-O2W              | 143.5(2) | O30-Tb1-O6W              | 70.2(3)  |
| O1W-Tb1-O3W               | 72.1(2)  | O4W-Tb1-O3W              | 80.8(2)  | O5W-Tb1-O3W              | 141.2(2) |
| O1W-Tb1-O5W               | 74.2(2)  | O4W-Tb1-O5W              | 74.4(2)  | O6W-Tb1-O18 <sup>1</sup> | 87.3(3)  |
| O4W-Tb1-O18 <sup>1</sup>  | 144.4(2) | O4W-Tb1-O6W              | 96.4(3)  | O6W-Tb1-O1W              | 145.1(3) |
| O4W-Tb1-O30               | 75.2(2)  | O2W-Tb1-O3W              | 72.9(3)  | O6W-Tb1-O2W              | 89.4(3)  |
| O4W-Tb1-O1W               | 79.2(2)  | O2W-Tb1-O5W              | 140.6(3) | O6W-Tb1-O3W              | 141.9(3) |
